# Supplementary material
Source: MDPI journal article supplement (https://www.mdpi.com/2227-9040/11/2/126)
Supplement: s1 [file s1]

# Design of a Decision Support System to Operate a NO<sub>2</sub> Gas Sensor Using Machine Learning, Sensitive Analysis and Conceptual Control Process Modelling

Mohammad Gheibi <sup>1</sup>, Hadi Taghavian <sup>2</sup>, Reza Moezzi <sup>2,\*</sup>, Stanislaw Wacławek <sup>2</sup>, Jindrich Cyrus <sup>2</sup>, Anna Dawiec-Lisniewska <sup>3</sup>, Jan Koci <sup>2</sup> and Masoud Khaleghiabbasabadi <sup>2</sup>

<sup>1</sup>Association of Talent under Liberty in Technology (TULTECH), 10615 Tallinn, Estonia

<sup>2</sup>Institute for Nanomaterials, Advanced Technologies and Innovation, Technical University of Liberec, 46117 Liberec, Czech Republic

<sup>3</sup>Department of Advanced Materials Technologies, Faculty of Chemistry, Wrocław University of Science and Technology, 50-373 Wrocław, Poland

\*Correspondence: reza.moezzi@tul.cz

**Table S1.** The outcomes of descriptive statistical analysis of response time and sensitivity.

| Descriptive statistics  | Response time values | Sensitivity values |
|-------------------------|----------------------|--------------------|
| Mean                    | 325.96               | 31.24              |
| Standard Error          | 35.87                | 8.45               |
| Median                  | 335.00               | 12.00              |
| Mode                    | #N/A                 | 12.00              |
| Standard Deviation      | 179.33               | 42.24              |
| Sample Variance         | 32159.21             | 1784.61            |
| Kurtosis                | -1.00                | 2.28               |
| Skewness                | -0.12                | 1.77               |
| Range                   | 598.00               | 151.00             |
| Minimum                 | 32.00                | 1.00               |
| Maximum                 | 630.00               | 152.00             |
| Sum                     | 8149.00              | 781.00             |
| Count                   | 25.00                | 25.00              |
| Largest(1)              | 630.00               | 152.00             |
| Smallest(1)             | 32.00                | 1.00               |
| Confidence Level(95.0%) | 74.02                | 17.44              |

**Table S2.** ANOVA results of the quadratic model for response time answer.

| Source                           | Sum of Squares | df | Mean Square | F Value  | p-value (Prob > F) |
|----------------------------------|----------------|----|-------------|----------|--------------------|
| Model                            | 759119.2       | 9  | 84346.58    | 99.60824 | < 0.0001           |
| A-Fe <sub>3</sub> O <sub>4</sub> | 481.6526       | 1  | 481.6526    | 0.568803 | 0.4624             |
| B-NO <sub>2</sub>                | 989.2694       | 1  | 989.2694    | 1.168268 | 0.2968             |
| C-Sensitivity                    | 242.378        | 1  | 242.378     | 0.286234 | 0.6005             |
| AB                               | 507.8223       | 1  | 507.8223    | 0.599708 | 0.4507             |
| AC                               | 67.85406       | 1  | 67.85406    | 0.080132 | 0.7810             |
| BC                               | 21.22913       | 1  | 21.22913    | 0.02507  | 0.8763             |
| A <sup>2</sup>                   | 17.58457       | 1  | 17.58457    | 0.020766 | 0.8873             |
| B <sup>2</sup>                   | 14084.49       | 1  | 14084.49    | 16.63294 | 0.0010             |
| C <sup>2</sup>                   | 289.9065       | 1  | 289.9065    | 0.342362 | 0.5672             |

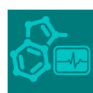

|           |          |    |          |
|-----------|----------|----|----------|
| Residual  | 12701.75 | 15 | 846.7831 |
| Cor Total | 771821   | 24 |          |

Table S3. ANOVA results of the cubic model for sensitivity answer.

| Source                                    | Sum of Squares | df | Mean Square | F Value  | p-value (Prob > F) |             |
|-------------------------------------------|----------------|----|-------------|----------|--------------------|-------------|
| Model                                     | 42808.13       | 19 | 2253.06     | 502.2793 | < 0.0001           | significant |
| A-Fe <sub>3</sub> O <sub>4</sub> additive | 17.38261       | 1  | 17.38261    | 3.875142 | 0.1061             |             |
| B-NO <sub>2</sub>                         | 22.92347       | 1  | 22.92347    | 5.110378 | 0.0733             |             |
| C-Response Time                           | 27.63673       | 1  | 27.63673    | 6.161114 | 0.0557             |             |
| AB                                        | 17.03223       | 1  | 17.03223    | 3.797032 | 0.1089             |             |
| AC                                        | 14.87183       | 1  | 14.87183    | 3.315408 | 0.1283             |             |
| BC                                        | 16.36063       | 1  | 16.36063    | 3.64731  | 0.1144             |             |
| A <sup>2</sup>                            | 11.95904       | 1  | 11.95904    | 2.666054 | 0.1634             |             |
| B <sup>2</sup>                            | 12.89767       | 1  | 12.89767    | 2.875304 | 0.1507             |             |
| C <sup>2</sup>                            | 8.476267       | 1  | 8.476267    | 1.889632 | 0.2277             |             |
| ABC                                       | 19.3308        | 1  | 19.3308     | 4.309456 | 0.0925             |             |
| A <sup>2</sup> B                          | 16.32759       | 1  | 16.32759    | 3.639943 | 0.1147             |             |
| A <sup>2</sup> C                          | 7.872781       | 1  | 7.872781    | 1.755096 | 0.2426             |             |
| AB <sup>2</sup>                           | 22.37084       | 1  | 22.37084    | 4.987178 | 0.0759             |             |
| AC <sup>2</sup>                           | 8.230282       | 1  | 8.230282    | 1.834794 | 0.2336             |             |
| B <sup>2</sup> C                          | 14.45004       | 1  | 14.45004    | 3.221378 | 0.1326             |             |
| BC <sup>2</sup>                           | 13.41669       | 1  | 13.41669    | 2.991011 | 0.1443             |             |
| A <sup>3</sup>                            | 5.708059       | 1  | 5.708059    | 1.27251  | 0.3105             |             |
| B <sup>3</sup>                            | 11.05561       | 1  | 11.05561    | 2.46465  | 0.1772             |             |
| C <sup>3</sup>                            | 9.147208       | 1  | 9.147208    | 2.039206 | 0.2127             |             |
| Residual                                  | 22.42835       | 5  | 4.485671    |          |                    |             |
| Cor Total                                 | 42830.56       | 24 |             |          |                    |             |

## Equation S1

Meta.ReggressionByDiscretization

Sensitivity % &lt;= 8

| Sensitivity % &lt;= 6

| | NO<sub>2</sub> (mgL<sup>-1</sup>) <= 2.5: '(570.2-inf)' (3.0/1.0)| | NO<sub>2</sub> (mgL<sup>-1</sup>) > 2.5: '(510.4-570.2]' (4.0/1.0)

| Sensitivity % &gt; 6: '(390.8-450.6]' (2.0)

Sensitivity % &gt; 8

| Sensitivity % &lt;= 18

| | Sensitivity % &lt;= 12: '(331-390.8]' (5.0/1.0)

| | Sensitivity % &gt; 12: '(271.2-331]' (3.0)

| Sensitivity % &gt; 18

| | NO<sub>2</sub> (mgL<sup>-1</sup>) <= 10: '(91.8-151.6]' (3.0/1.0)| | NO<sub>2</sub> (mgL<sup>-1</sup>) > 10: '(-inf-91.8]' (5.0/1.0)

## Equation S2

M5. Rules

M5 pruned model rules

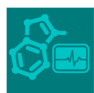

(using smoothed linear models):

Number of Rules: 3

Rule: 1

IF

Sensitivity %  $\leq 45$

Sensitivity %  $> 9$

THEN

Response time (Sec) =

$-9.8354 * \text{Sensitivity \%}$

$+ 492.5191$  [10/10.137%]

Rule: 2

IF

Sensitivity %  $\leq 36.5$

THEN

Response time (Sec) =

$5.6654 * \text{NO}_2 \text{ (mgL}^{-1}\text{)}$

$- 14.7605 * \text{Sensitivity \%}$

$+ 542.3807$  [9/11.546%]

Rule: 3

Response time (Sec) =

$-1.6942 * \text{NO}_2 \text{ (mgL}^{-1}\text{)}$

$+ 121.8462$  [6/31.184%]

### Equation S3

Gaussian Processes

Kernel used:

Linear Kernel:  $K(x,y) = \langle x,y \rangle$

All values shown based on: Normalize training data

Average Target Value : 0.491571906354515

Inverted Covariance Matrix:

Lowest Value = -0.24231691064261593

Highest Value = 1.0

Inverted Covariance Matrix \* Target-value Vector:

Lowest Value = -0.17786731765046457

Highest Value = 0.508428093645485

### Equation S4

Meta.RegressionByDiscretization

$\text{NO}_2 \text{ (mgL}^{-1}\text{)} \leq 20$

| Response time (Sec)  $\leq 220$

| |  $\text{NO}_2 \text{ (mgL}^{-1}\text{)} \leq 10$ : '(61.4-76.5]' (3.0/1.0)

| |  $\text{NO}_2 \text{ (mgL}^{-1}\text{)} > 10$ : '(76.5-91.6]' (2.0/1.0)

| Response time (Sec)  $> 220$ : '(-inf-16.1]' (15.0)

$\text{NO}_2 \text{ (mgL}^{-1}\text{)} > 20$

|  $\text{Fe}_3\text{O}_4$  additive (%)  $\leq 10$ : '(16.1-31.2]' (3.0)

|  $\text{Fe}_3\text{O}_4$  additive (%)  $> 10$ : '(121.8-136.9]' (2.0/1.0)

### Equation S5

M5. Rules

M5 pruned model rules



(using smoothed linear models) :

Number of Rules : 3

Rule: 1

IF

Response time (Sec) > 165

Response time (Sec) <= 395

THEN

Sensitivity % =

$-0.1232 * \text{Response time (Sec)}$

$+ 61.7204$  [10/3.664%]

Rule: 2

IF

Response time (Sec) > 265

THEN

Sensitivity % =

$-0.1322 * \text{Response time (Sec)}$

$+ 72.5235$  [9/4.516%]

Rule: 3

Sensitivity % =

$-1.0266 * \text{Response time (Sec)}$

$+ 177.3689$  [6/21.572%]

#### Equation S6

Gaussian Processes

Kernel used:

Linear Kernel:  $K(x,y) = \langle x,y \rangle$

All values shown based on: Normalize training data

Average Target Value : 0.20026490066225164

Inverted Covariance Matrix:

Lowest Value = -0.18244372703862421

Highest Value = 0.9645847363656818

Inverted Covariance Matrix \* Target-value Vector:

Lowest Value = -0.2516629640131336

Highest Value = 0.4036168214263314

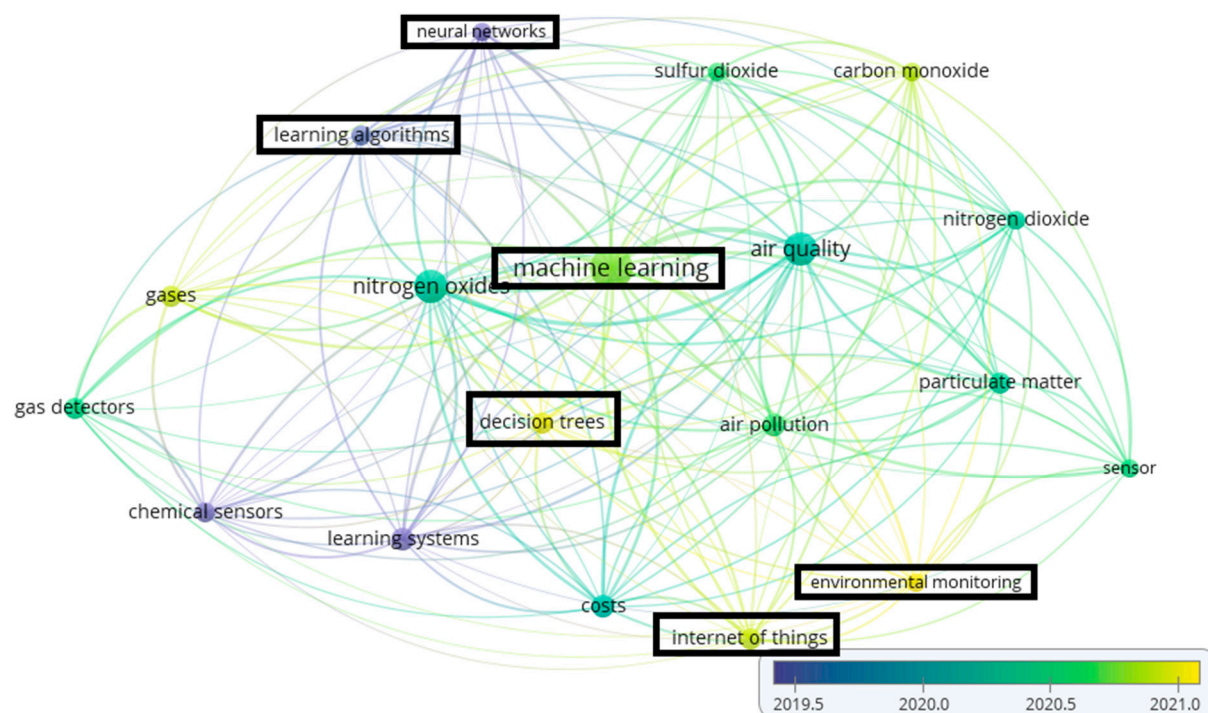

**Figure S1.** The outputs of the Scientometry analysis of machine learning applications in gas sensor creation based on keyword occurrence.

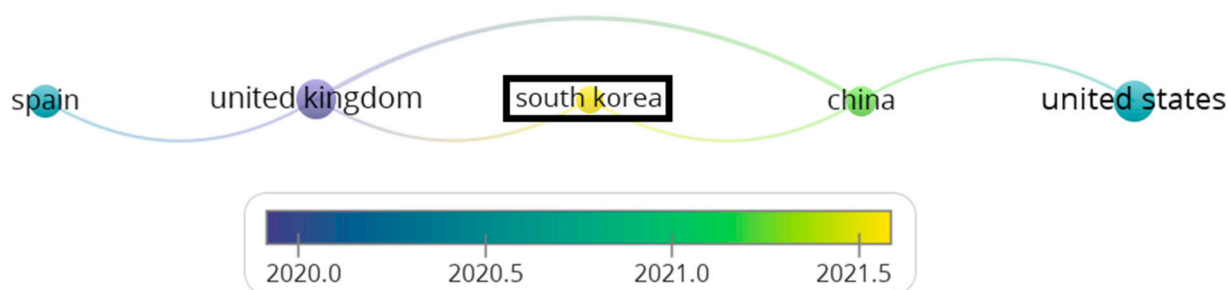

**Figure S2.** The contribution of countries in the field of artificial intelligence in gas-sensor designing.

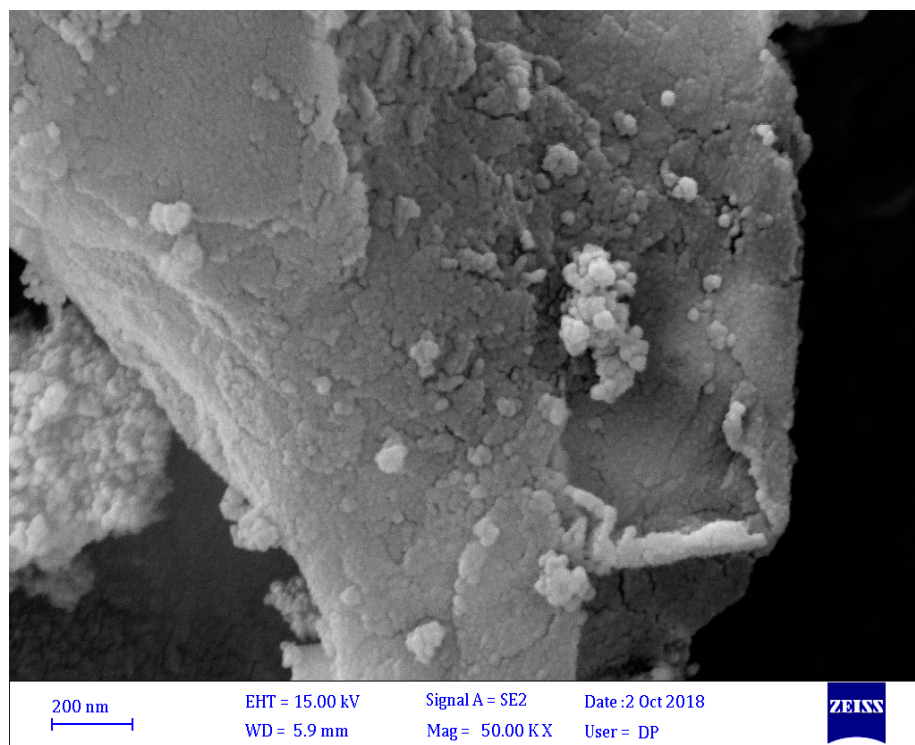

**Figure S3.** The FESEM characterization of  $\text{Fe}_3\text{O}_4\text{-rGOQD-SO}_3\text{H}$  as  $\text{NO}_2$  gas sensor in this research.
